# Supplementary material for: Effect of Immobilized Pediococcus acidilactici ORE5 Cells on Pistachio Nuts on the Functional Regulation of the Novel Katiki Domokou-Type Cheese Microbiome
Source: MDPI journal article supplement (doi:10.3390/app13148047), 2023-07-10
Supplement: s1 [file s1]

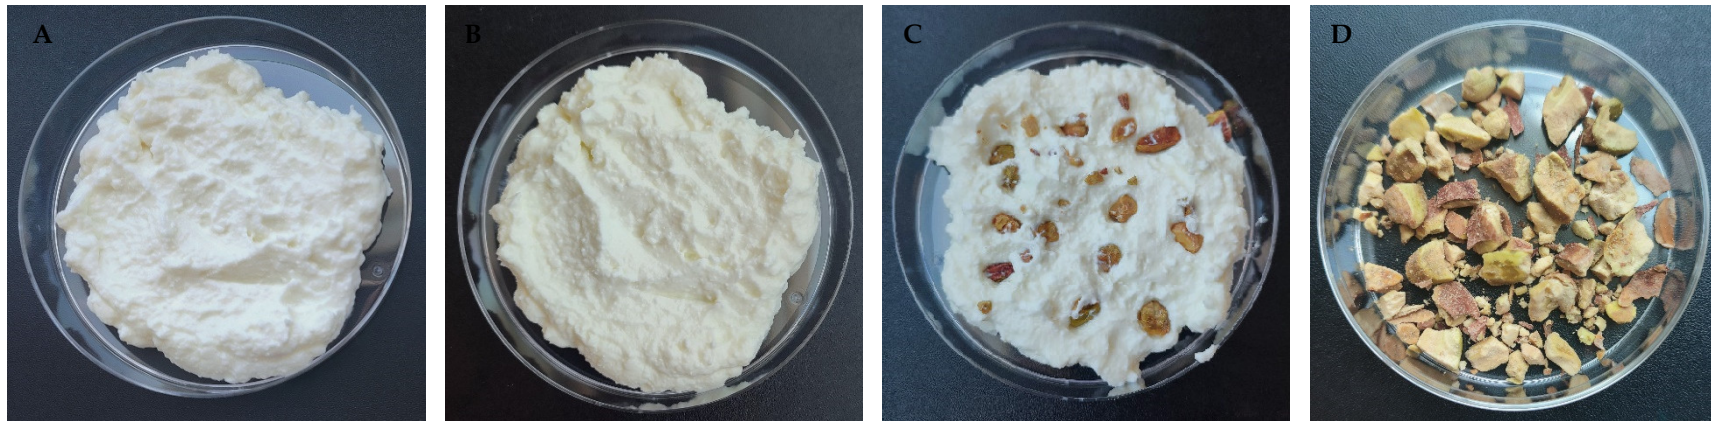

**Figure S1.** Katiki Domokou type cheese samples. (A) Katiki Domokou type cheese sample without *P. acidilactici* ORE5 cells- control (KC), (B) Katiki Domokou type cheese sample fortified with free *P. acidilactici* ORE5 cells (KFP), (C) Katiki Domokou type cheese sample fortified with immobilized *P. acidilactici* ORE5 cells on pistachio nuts (KIP), (D) Freeze-dried immobilized *P. acidilactici* ORE5 cells on pistachio nuts.
